# Supplementary material for: Theoretical–experimental prediction of the selectivity between polyamidoamine dendrimers and bioactive peptides derived from amaranth seeds
Source: Royal Society of Chemistry journal article supplement (doi:10.1039/d3nj01344h), 2023-01-01
Supplement: d3nj01344h1.pdf [file d3nj01344h1.pdf]

# New Journal of Chemistry

## Supporting Information

### THEORETICAL-EXPERIMENTAL PREDICTION OF THE SELECTIVITY BETWEEN POLYAMIDOAMINE DENDRIMERS AND BIOACTIVE PEPTIDES DERIVED FROM AMARANTH SEED.

Alejandro Fajardo De La Rosa, Oscar Hernández-Meléndez, , J. Manuel Saniger-Blesa, Ma. Inés  
Nicolás-Vázquez, Eduardo Bárzana\*

#### Contents of supporting information:

1. **Table S1.** Final Z matriz between YLAGKPQQEH and PAMAM. With their absolute energies (Hartrees).
2. **Table S2.** Final Z matriz between AMINO ACID TYROSINE and PAMAM. With their absolute energies (Hartrees). With their absolute energies (Hartrees).
3. **Table S3.** Final Z matriz of PAMAM. With their absolute energies (Hartrees).
4. **Table S4.** Final Z matriz of YLAGKPQQEH. With their absolute energies (Hartrees).
5. **Table S5.** Final Z matriz AMINO ACID TYROSINE. With their absolute energies (Hartrees).

**1. Table S1.** Final Z matrix between YLAGKPQQEH and PAMAM. With their absolute energies (Hartrees).

Electronic energy = -5694.929030 Hartrees.

|   |    |        |        |       |  |   |     |          |          |        |   |     |          |          |        |   |     |          |          |        |
|---|----|--------|--------|-------|--|---|-----|----------|----------|--------|---|-----|----------|----------|--------|---|-----|----------|----------|--------|
| C | 1  | B1     |        |       |  | H | 59  | B62 58   | A61 53   | D60 0  | N | 122 | B123 119 | A122 116 | D121 0 | C | 176 | B184 168 | A183 165 | D182 0 |
| C | 2  | B2 1   | A1     |       |  | C | 59  | B63 58   | A62 53   | D61 0  | H | 124 | B124 122 | A123 119 | D122 0 | H | 185 | B185 176 | A184 168 | D183 0 |
| O | 3  | B3 2   | A2 1   | D1 0  |  | H | 64  | B64 59   | A63 58   | D62 0  | H | 124 | B125 122 | A124 119 | D123 0 | H | 185 | B186 176 | A185 168 | D184 0 |
| H | 1  | B4 2   | A3 3   | D2 0  |  | H | 64  | B65 59   | A64 58   | D63 0  | N | 112 | B126 111 | A125 110 | D124 0 | C | 170 | B187 169 | A186 163 | D185 0 |
| H | 2  | B5 1   | A4 3   | D3 0  |  | C | 64  | B66 59   | A65 58   | D64 0  | C | 127 | B127 112 | A126 110 | D125 0 | H | 188 | B188 170 | A187 169 | D186 0 |
| C | 2  | B6 1   | A5 3   | D4 0  |  | H | 67  | B67 64   | A66 59   | D65 0  | C | 128 | B128 127 | A127 112 | D126 0 | H | 188 | B189 170 | A188 169 | D187 0 |
| C | 7  | B7 2   | A6 1   | D5 0  |  | H | 67  | B68 64   | A67 59   | D66 0  | O | 129 | B129 128 | A128 127 | D127 0 | C | 173 | B190 169 | A189 163 | D188 0 |
| H | 7  | B8 2   | A7 1   | D6 0  |  | C | 67  | B69 64   | A68 59   | D67 0  | H | 127 | B130 112 | A129 111 | D128 0 | C | 191 | B191 173 | A190 169 | D189 0 |
| H | 7  | B9 2   | A8 1   | D7 0  |  | H | 70  | B70 67   | A69 64   | D68 0  | H | 128 | B131 127 | A130 112 | D129 0 | H | 191 | B192 173 | A191 169 | D190 0 |
| C | 8  | B10 7  | A9 2   | D8 0  |  | C | 70  | B71 67   | A70 64   | D69 0  | C | 128 | B132 127 | A131 112 | D130 0 | C | 188 | B193 170 | A192 169 | D191 0 |
| C | 8  | B11 7  | A10 2  | D9 0  |  | H | 70  | B72 67   | A71 64   | D70 0  | C | 133 | B133 128 | A132 127 | D131 0 | C | 191 | B194 173 | A193 169 | D192 0 |
| C | 8  | B12 7  | A11 2  | D10 0 |  | H | 72  | B73 70   | A72 67   | D71 0  | H | 133 | B134 128 | A133 127 | D132 0 | C | 182 | B195 179 | A194 168 | D193 0 |
| C | 13 | B13 8  | A12 7  | D11 0 |  | H | 72  | B74 70   | A73 67   | D72 0  | H | 133 | B135 128 | A134 127 | D133 0 | C | 185 | B196 176 | A195 168 | D194 0 |
| C | 12 | B14 8  | A13 7  | D12 0 |  | N | 72  | B75 70   | A74 67   | D73 0  | H | 134 | B136 133 | A135 128 | D134 0 | O | 197 | B197 185 | A196 176 | D195 0 |
| H | 12 | B15 8  | A14 7  | D13 0 |  | H | 76  | B76 72   | A75 70   | D74 0  | H | 134 | B137 133 | A136 128 | D135 0 | O | 196 | B198 182 | A197 179 | D196 0 |
| H | 13 | B16 8  | A15 7  | D14 0 |  | H | 76  | B77 72   | A76 70   | D75 0  | C | 134 | B138 133 | A137 128 | D136 0 | O | 195 | B199 191 | A198 173 | D197 0 |
| H | 14 | B17 13 | A16 8  | D15 0 |  | N | 60  | B78 59   | A77 58   | D76 0  | O | 139 | B139 134 | A138 133 | D137 0 | O | 194 | B200 188 | A199 170 | D198 0 |
| H | 15 | B18 12 | A17 8  | D16 0 |  | C | 79  | B79 60   | A78 59   | D77 0  | O | 139 | B140 134 | A139 133 | D138 0 | N | 196 | B201 182 | A200 179 | D199 0 |
| O | 11 | B19 8  | A18 7  | D17 0 |  | C | 80  | B80 79   | A79 60   | D78 0  | H | 141 | B141 139 | A140 134 | D139 0 | H | 202 | B202 196 | A201 182 | D200 0 |
| H | 20 | B20 11 | A19 8  | D18 0 |  | O | 81  | B81 80   | A80 79   | D79 0  | N | 129 | B142 128 | A141 127 | D140 0 | N | 195 | B203 191 | A202 173 | D201 0 |
| N | 3  | B21 2  | A20 1  | D19 0 |  | C | 79  | B82 60   | A81 59   | D80 0  | C | 143 | B143 129 | A142 128 | D141 0 | H | 204 | B204 195 | A203 191 | D202 0 |
| C | 22 | B22 3  | A21 2  | D20 0 |  | C | 80  | B83 79   | A82 60   | D81 0  | C | 144 | B144 143 | A143 129 | D142 0 | N | 194 | B205 188 | A204 170 | D203 0 |
| C | 23 | B23 22 | A22 3  | D21 0 |  | H | 84  | B84 80   | A83 79   | D82 0  | O | 145 | B145 144 | A144 143 | D143 0 | H | 206 | B206 194 | A205 188 | D204 0 |
| O | 24 | B24 23 | A23 22 | D22 0 |  | C | 83  | B85 79   | A84 60   | D83 0  | H | 143 | B146 129 | A145 128 | D144 0 | N | 197 | B207 185 | A206 176 | D205 0 |
| H | 22 | B25 3  | A24 2  | D23 0 |  | H | 84  | B86 80   | A85 79   | D84 0  | H | 144 | B147 143 | A146 129 | D145 0 | H | 208 | B208 197 | A207 185 | D206 0 |
| H | 23 | B26 22 | A25 3  | D24 0 |  | H | 86  | B87 83   | A86 79   | D85 0  | C | 144 | B148 143 | A147 129 | D146 0 | C | 202 | B209 196 | A208 182 | D207 0 |
| C | 23 | B27 22 | A26 3  | D25 0 |  | H | 86  | B88 83   | A87 79   | D86 0  | C | 149 | B149 144 | A148 143 | D147 0 | H | 210 | B210 202 | A209 196 | D208 0 |
| C | 28 | B28 23 | A27 22 | D26 0 |  | H | 83  | B89 79   | A88 60   | D87 0  | H | 149 | B150 144 | A149 143 | D148 0 | C | 210 | B211 202 | A210 196 | D209 0 |
| H | 28 | B29 23 | A28 22 | D27 0 |  | H | 83  | B90 79   | A89 60   | D88 0  | H | 149 | B151 144 | A150 143 | D149 0 | H | 210 | B212 202 | A211 196 | D210 0 |
| C | 29 | B30 28 | A29 23 | D28 0 |  | H | 80  | B91 79   | A90 60   | D89 0  | C | 150 | B152 149 | A151 144 | D150 0 | H | 213 | B213 210 | A212 202 | D211 0 |
| H | 31 | B31 29 | A30 28 | D29 0 |  | N | 81  | B92 80   | A91 79   | D90 0  | N | 150 | B153 149 | A152 144 | D151 0 | N | 213 | B214 210 | A213 202 | D212 0 |
| H | 28 | B32 23 | A31 22 | D30 0 |  | C | 93  | B93 81   | A92 80   | D91 0  | H | 153 | B154 150 | A153 149 | D152 0 | N | 213 | B215 210 | A214 202 | D213 0 |
| C | 31 | B33 29 | A32 28 | D31 0 |  | C | 94  | B94 93   | A93 81   | D92 0  | H | 153 | B155 150 | A154 149 | D153 0 | H | 216 | B216 213 | A215 210 | D214 0 |
| H | 34 | B34 31 | A33 29 | D32 0 |  | O | 95  | B95 94   | A94 93   | D93 0  | C | 154 | B156 150 | A155 149 | D154 0 | H | 216 | B217 213 | A216 210 | D215 0 |
| H | 34 | B35 31 | A34 29 | D33 0 |  | H | 93  | B96 81   | A95 80   | D94 0  | N | 157 | B157 154 | A156 150 | D155 0 | C | 204 | B218 195 | A217 191 | D216 0 |
| H | 34 | B36 31 | A35 29 | D34 0 |  | H | 94  | B97 93   | A96 81   | D95 0  | H | 157 | B158 154 | A157 150 | D156 0 | H | 219 | B219 204 | A218 195 | D217 0 |
| H | 29 | B37 28 | A36 23 | D35 0 |  | C | 94  | B98 93   | A97 81   | D96 0  | H | 1   | B159 2   | A158 3   | D157 0 | H | 219 | B220 204 | A219 195 | D218 0 |
| H | 29 | B38 28 | A37 23 | D36 0 |  | H | 99  | B99 94   | A98 93   | D97 0  | H | 145 | B160 144 | A159 143 | D158 0 | C | 219 | B221 204 | A220 185 | D219 0 |
| H | 29 | B39 28 | A38 23 | D37 0 |  | H | 99  | B100 94  | A99 93   | D98 0  | H | 72  | B161 70  | A160 67  | D159 0 | H | 222 | B222 219 | A221 204 | D220 0 |
| N | 24 | B40 23 | A39 22 | D38 0 |  | C | 99  | B101 94  | A100 93  | D99 0  | C | 70  | B162 67  | A161 64  | D160 0 | H | 222 | B223 219 | A222 204 | D221 0 |
| C | 41 | B41 24 | A40 23 | D39 0 |  | H | 102 | B102 99  | A101 94  | D100 0 | H | 163 | B163 70  | A162 67  | D161 0 | N | 222 | B224 219 | A223 204 | D222 0 |
| C | 42 | B42 41 | A41 24 | D40 0 |  | H | 102 | B103 99  | A102 94  | D101 0 | C | 163 | B164 70  | A163 67  | D162 0 | H | 225 | B225 222 | A224 219 | D223 0 |
| O | 43 | B43 42 | A42 41 | D41 0 |  | C | 102 | B104 99  | A103 94  | D102 0 | H | 165 | B165 163 | A164 70  | D163 0 | H | 225 | B226 222 | A225 219 | D224 0 |
| H | 41 | B44 24 | A43 23 | D42 0 |  | O | 105 | B105 102 | A104 99  | D103 0 | H | 165 | B166 163 | A165 70  | D164 0 | C | 206 | B227 194 | A226 188 | D225 0 |
| H | 42 | B45 41 | A44 24 | D43 0 |  | N | 105 | B106 102 | A105 99  | D104 0 | N | 165 | B167 163 | A166 70  | D165 0 | H | 228 | B228 206 | A227 194 | D226 0 |
| C | 42 | B46 41 | A45 24 | D44 0 |  | H | 107 | B107 105 | A106 102 | D105 0 | N | 163 | B168 70  | A167 67  | D166 0 | H | 228 | B229 206 | A228 194 | D227 0 |
| H | 47 | B47 42 | A46 41 | D45 0 |  | H | 107 | B108 105 | A107 102 | D106 0 | C | 169 | B169 163 | A168 70  | D167 0 | C | 228 | B230 206 | A229 194 | D228 0 |
| H | 47 | B48 42 | A47 41 | D46 0 |  | N | 95  | B109 94  | A108 93  | D107 0 | H | 170 | B170 169 | A169 163 | D168 0 | H | 231 | B231 228 | A230 206 | D229 0 |
| H | 47 | B49 42 | A48 41 | D47 0 |  | C | 110 | B110 95  | A109 94  | D108 0 | H | 170 | B171 169 | A170 163 | D169 0 | H | 231 | B232 228 | A231 206 | D230 0 |
| N | 43 | B50 42 | A49 41 | D48 0 |  | C | 111 | B111 110 | A110 95  | D109 0 | C | 169 | B172 163 | A171 70  | D170 0 | N | 231 | B233 228 | A232 206 | D231 0 |
| C | 51 | B51 43 | A50 42 | D49 0 |  | O | 112 | B112 111 | A111 110 | D110 0 | H | 173 | B173 169 | A172 163 | D171 0 | H | 234 | B234 231 | A233 228 | D232 0 |
| C | 52 | B52 51 | A51 43 | D50 0 |  | H | 110 | B113 95  | A112 94  | D111 0 | C | 173 | B174 169 | A173 163 | D172 0 | H | 234 | B235 231 | A234 228 | D233 0 |
| O | 53 | B53 52 | A52 51 | D51 0 |  | H | 111 | B114 110 | A113 95  | D112 0 | C | 168 | B175 165 | A174 163 | D173 0 | C | 208 | B236 197 | A235 185 | D234 0 |
| H | 51 | B54 43 | A53 42 | D52 0 |  | C | 111 | B115 110 | A114 95  | D113 0 | H | 176 | B176 168 | A175 165 | D174 0 | H | 237 | B237 208 | A236 197 | D235 0 |
| H | 52 | B55 51 | A54 43 | D53 0 |  | H | 116 | B116 111 | A115 110 | D114 0 | H | 176 | B177 168 | A176 165 | D175 0 | H | 237 | B238 208 | A237 197 | D236 0 |
| H | 52 | B56 51 | A55 43 | D54 0 |  | H | 116 | B117 111 | A116 110 | D115 0 | C | 168 | B178 165 | A177 163 | D176 0 | C | 237 | B239 208 | A238 197 | D237 0 |
| N | 53 | B57 52 | A56 51 | D55 0 |  | C | 116 | B118 111 | A117 110 | D116 0 | H | 179 | B179 168 | A178 165 | D177 0 | H | 240 | B240 237 | A239 208 | D238 0 |
| C | 58 | B58 53 | A57 52 | D56 0 |  | H | 119 | B119 116 | A118 111 | D117 0 | H | 179 | B180 168 | A179 165 | D178 0 | H | 240 | B241 237 | A240 208 | D239 0 |
| C | 59 | B59 58 | A58 53 | D57 0 |  | H | 119 | B120 116 | A119 111 | D118 0 | C | 179 | B181 168 | A180 165 | D179 0 | N | 240 | B242 237 | A241 208 | D240 0 |
| O | 60 | B60 59 | A59 58 | D58 0 |  | C | 119 | B121 116 | A120 111 | D119 0 | H | 182 | B182 179 | A181 168 | D180 0 | H | 243 | B243 240 | A242 237 | D241 0 |
| H | 58 | B61 53 | A60 52 | D59 0 |  | O | 122 | B122 119 | A121 116 | D120 0 | H | 182 | B183 179 | A182 168 | D181 0 | H | 243 | B244 240 | A243 237 | D242 0 |

Continuation

| 1                   | 2                  | 3                 | 4                 | 5                   | 6                  | 7                   |
|---------------------|--------------------|-------------------|-------------------|---------------------|--------------------|---------------------|
| B1 146343576        | B53 1.23260860     | B05 1.22487504    | B157 1.35860219   | B209 1.46109822     | A17 121.15633196   | A69 109.95214663    |
| B2 153316605        | B54 1.0357880      | B06 1.31618904    | B158 1.08073403   | B210 1.09787219     | A18 176.68561060   | A70 114.197150      |
| B3 124252761        | B55 1.08956100     | B07 1.01488824    | B159 1.01672162   | B211 1.09232679     | A19 110.95786804   | A71 109.34598355    |
| B4 10756932         | B56 1.09949884     | B08 1.00767613    | B160 1.03920957   | B212 1.53783590     | A20 115.5753355    | A72 109.45283234    |
| B5 109337545        | B57 1.3609780      | B09 1.34953912    | B161 4.13440477   | B213 1.09563293     | A21 121.90535392   | A73 109.8946607     |
| B6 155025873        | B58 1.45807439     | B10 1.46475890    | B162 4.96780694   | B214 1.09850693     | A22 114.8856309    | A74 110.338642695   |
| B7 151249489        | B59 1.54555860     | B11 1.5486254     | B163 1.09691672   | B215 1.45946601     | A23 119.16642397   | A75 109.7246957     |
| B8 10933102         | B60 1.24024705     | B12 1.22484804    | B164 1.54757828   | B216 1.01813254     | A24 113.75497930   | A76 108.86250640    |
| B9 10966123         | B61 1.01475833     | B13 1.0829524     | B165 1.09756522   | B217 1.01803335     | A25 117.32532863   | A77 121.8103738     |
| B10 2.83604456      | B62 1.09627777     | B14 1.0973181     | B166 1.09319555   | B218 1.45101247     | A26 112.50250203   | A78 116.0694405     |
| B11 140354096       | B63 1.53831842     | B15 1.55081214    | B167 1.46758526   | B219 1.09312066     | A27 112.18164285   | A79 114.27020272    |
| B12 140353970       | B64 1.09817640     | B16 1.09352188    | B168 1.46687351   | B220 1.09724755     | A28 115.14090326   | A80 116.79517395    |
| B13 139203096       | B65 1.09467868     | B17 1.09420675    | B169 1.46515810   | B221 1.53385304     | A29 93.03654775    | A81 128.27329408    |
| B14 139328104       | B66 1.53491640     | B18 1.52763735    | B170 1.01431651   | B222 1.09497278     | A30 117.97477019   | A82 113.94260264    |
| B15 108797678       | B67 1.09758100     | B19 1.09524991    | B171 1.0948532    | B223 1.09639491     | A31 108.20329660   | A83 109.85076040    |
| B16 108791801       | B68 1.09833694     | B20 1.09283703    | B172 1.46546583   | B224 1.48230607     | A32 110.18472734   | A84 112.68224242    |
| B17 108750266       | B69 1.53816691     | B21 1.52507722    | B173 1.09613792   | B225 1.0870718      | A33 111.43783766   | A85 111.58050219    |
| B18 108505223       | B70 1.09760362     | B22 1.22920849    | B174 1.08338607   | B226 1.09530731     | A34 110.96676151   | A86 109.06821668    |
| B19 11.34706738     | B71 1.52882780     | B23 1.36274559    | B175 1.46373710   | B227 1.45772562     | A35 111.05394762   | A87 111.36877234    |
| B20 10307446        | B72 1.09391969     | B24 1.01673300    | B176 1.03481879   | B228 1.09409500     | A36 95.99672660    | A88 110.67957849    |
| B21 135150538       | B73 1.09475244     | B25 1.00810428    | B177 1.09186191   | B229 1.09525788     | A37 91.45705142    | A89 110.05619953    |
| B22 146710538       | B74 1.01046882     | B26 1.38387528    | B178 1.46577020   | B230 1.54158594     | A38 143.4407287    | A90 110.87364545    |
| B23 135899625       | B75 1.47952925     | B27 1.46447299    | B179 1.05922215   | B231 1.09213387     | A39 117.02643048   | A91 117.9737996     |
| B24 1.22639867      | B76 1.01787443     | B28 1.53703048    | B180 1.09089529   | B232 1.09546294     | A40 122.92918490   | A92 123.2367876     |
| B25 1.01738885      | B77 1.01995295     | B29 1.23391073    | B181 1.53752179   | B233 1.46763354     | A41 113.30822819   | A93 116.56130391    |
| B26 1.09588682      | B78 1.35559868     | B30 1.01875011    | B182 1.09628746   | B234 1.01773994     | A42 112.16831978   | A94 123.5879615     |
| B27 154376430       | B79 1.47385010     | B31 1.09565311    | B183 1.09242699   | B235 1.01859208     | A43 117.95882494   | A95 116.78187373    |
| B28 2.58526194      | B80 1.53037516     | B32 1.54108615    | B184 1.53916486   | B236 1.45300856     | A44 115.44012976   | A96 116.25167232    |
| B29 1.09439103      | B81 1.24582189     | B33 1.53407911    | B185 1.094710003  | B237 1.093161484    | A45 111.69298265   | A97 110.08968723    |
| B30 1.53708502      | B82 1.48239668     | B34 1.09298121    | B186 1.09282867   | B238 1.09985590     | A46 110.48440004   | A98 110.43058772    |
| B31 109833320       | B83 1.54885146     | B35 1.09349704    | B187 1.53955836   | B239 1.54051822     | A47 110.24474114   | A99 110.24374312    |
| B32 1.0995044       | B84 1.09577967     | B36 1.09158075    | B188 1.09495394   | B240 1.09582955     | A48 111.49051610   | A100 112.89684813   |
| B33 1.53815131      | B85 1.53103342     | B37 1.09912032    | B189 1.09493949   | B241 1.09666093     | A49 115.97423999   | A101 110.99446771   |
| B34 1.09483307      | B86 1.09072556     | B38 1.510754972   | B190 1.54884243   | B242 1.46277240     | A50 121.15789553   | A102 110.05940087   |
| B35 1.09454324      | B87 1.09547980     | B39 1.21619179    | B191 1.09393598   | B243 1.08053396     | A51 113.29814494   | A103 114.00038106   |
| B36 1.09898775      | B88 1.09207842     | B40 1.35557696    | B192 1.09667306   | B244 1.01797611     | A52 121.52779968   | A104 112.66898969   |
| B37 1.09401006      | B89 1.09526338     | B41 0.97727133    | B193 1.52305334   | B245 11.41239234    | A53 116.88872849   | A105 113.78805140   |
| B38 1.09789731      | B90 1.08842408     | B42 1.359095838   | B194 1.572244019  | A2 121.03781882     | A54 117.48299499   | A106 112.87277645   |
| B39 1.09467598      | B91 1.09251052     | B43 1.45547277    | B195 1.52656409   | A3 109.50783546     | A55 110.58994388   | A107 116.03679848   |
| B40 1.36022540      | B92 1.34811910     | B44 1.53216978    | B196 1.52276496   | A4 114.0204471      | A56 116.55307034   | A108 113.17201555   |
| B41 145862397       | B93 1.47954453     | B45 1.21063749    | B197 1.24004438   | A5 110.0818679      | A57 119.93740691   | A109 123.59359896   |
| B42 1.5478492       | B94 1.55530743     | B46 1.01081652    | B198 1.24689334   | A6 115.46255777     | A58 116.94432129   | A110 115.0870313    |
| B43 1.22379434      | B95 1.23239383     | B47 1.09991008    | B199 1.23201980   | A7 117.02747611     | A59 116.90677804   | A111 119.19457257   |
| B44 1.01024081      | B96 1.01917575     | B48 1.53562474    | B200 1.22820656   | A8 117.54772748     | A60 112.0275902    | A112 116.71020261   |
| B45 1.09485795      | B97 1.09651230     | B49 1.500819750   | B201 1.343981074  | A9 115.03381892     | A61 110.57289702   | A113 116.76187930   |
| B46 1.53004449      | B98 1.53468852     | B50 1.09568815    | B202 1.02508464   | A10 121.38236068    | A62 112.48534382   | A114 114.27099945   |
| B47 1.09281959      | B99 1.09271804     | B51 1.096891088   | B203 1.31811071   | A11 120.9389655     | A63 117.24752085   | A115 116.98677581   |
| B48 1.09042684      | B100 1.09408187    | B52 1.37359704    | B204 1.02546463   | A12 112.46277298    | A64 116.68825628   | A116 110.28908648   |
| B49 1.09835570      | B101 1.55007409    | B53 1.38823450    | B205 1.36889340   | A13 121.55457389    | A65 117.4701117    | A117 115.64109345   |
| B50 1.38509455      | B102 1.09132471    | B54 1.081009639   | B206 1.01094873   | A14 119.35102030    | A66 110.36282154   | A118 112.17061083   |
| B51 145335398       | B103 1.09634480    | B55 2.11347678    | B207 1.35647617   | A15 119.60267161    | A67 110.49812737   | A119 110.61746042   |
| B52 1.53287533      | B104 1.53276557    | B56 1.31842356    | B208 1.02596054   | A16 120.26676102    | A68 110.29474603   | A120 112.39487749   |
| 8                   | 9                  | 10                | 11                | 12                  | 13                 | 14                  |
| A121 123.70151220   | A73 113.785742     | A225 119.62107226 | 034 - 62.95231395 | 086 -158.5918510    | D138 -148.40184809 | 0190 67.1734641     |
| A122 123.78024440   | A74 112.03964294   | A226 119.61338474 | 035 1.656691077   | 087 110.0504530     | D139 -117.55863392 | 0191 -62.8176916    |
| A123 123.38180488   | A75 113.57964048   | A227 117.22681925 | 036 -106.63762495 | 088 -120.55633698   | D140 113.92420508  | 0192 -174.0328622   |
| A124 117.52123125   | A76 116.4767378    | A228 118.84862779 | 037 131.25145636  | 089 48.14531951     | D141 170.52909239  | 0193 156.22109374   |
| A125 118.31894906   | A77 115.23448560   | A229 118.87994478 | 038 -120.81488103 | 090 -121.35537753   | D142 -121.41875100 | 0194 163.12965917   |
| A126 117.53882824   | A78 113.48187726   | A230 117.18762551 | 039 115.29487950  | 091 -167.6686162    | D143 -151.81707234 | 0195 61.56094752    |
| A127 114.2770350    | A79 118.07562446   | A231 110.28285222 | 040 -110.72558218 | 092 -82.963910623   | D144 -2.91077518   | 0196 -54.51980262   |
| A128 119.37521967   | A80 112.01063161   | A232 115.56931266 | 041 -166.09173761 | 093 -116.332710572  | D145 -6.686950349  | 0197 -46.01660769   |
| A129 119.84737651   | A81 117.37179437   | A233 110.95044156 | 042 0.84041817    | 094 113.122880184   | D146 112.44153000  | 0198 63.21546593    |
| A130 1103.748519483 | A82 111.94227248   | A234 119.88523894 | 043 14.65743461   | 095 33.27873150     | D147 -78.68473835  | 0199 128.28584385   |
| A131 114.86237184   | A83 113.34240752   | A235 112.79869857 | 044 113.77738363  | 096 152.6712290     | D148 159.20317087  | 0200 -8.08693168    |
| A132 115.37458317   | A84 119.98425728   | A236 117.05933340 | 045 -62.38516971  | 097 69.38721480     | D149 45.29773937   | 0201 113.44366815   |
| A133 117.54730747   | A85 119.15372701   | A237 119.22905809 | 046 116.37310156  | 098 -45.91893738    | D150 0.85929884    | 0202 -1.22945396    |
| A134 117.75622685   | A86 111.92237103   | A238 113.48124448 | 047 58.18002360   | 099 -167.47508100   | D151 -177.7684433  | 0203 115.94310459   |
| A135 111.13810381   | A87 110.63858264   | A239 119.14303133 | 048 15.33275942   | D100 110.41623888   | D152 2.710898745   | 0204 -11.0186527    |
| A136 110.78678824   | A88 111.69252043   | A240 119.42800102 | 049 -178.27316980 | D101 -17.52095030   | D153 -119.2182624  | 0205 -116.4639409   |
| A137 112.17610402   | A89 116.39455693   | A241 114.8228043  | 050 -128.83280420 | D102 -137.939087625 | D154 179.07497975  | 0206 -6.39589839    |
| A138 125.93592523   | A90 114.1469146    | A242 110.0076510  | 051 113.96638576  | D103 -119.55810228  | D155 -0.26317441   | 0207 116.66343117   |
| A139 112.44765558   | A91 119.76303969   | A243 119.88621361 | 052 -6.12872300   | D104 110.50141905   | D156 119.68793408  | 0208 110.1132122    |
| A140 115.78601893   | A92 119.15752526   | 01 164.582751053  | 053 -10.0257782   | D105 2.69381077     | D157 -86.07292950  | 0209 -27.0810574    |
| A141 117.52719671   | A93 110.72947978   | 02 156.4460584    | 054 118.53382281  | D106 178.43927724   | D158 31.23492707   | 0210 -147.035801935 |
| A142 122.71047926   | A94 112.62968449   | 03 120.53670767   | 055 -68.37781946  | D107 64.57237910    | D159 110.81469219  | 0211 116.69943031   |
| A143 119.31066553   | A95 110.01094281   | 04 -117.34781079  | 056 -170.11456894 | D108 177.78817888   | D160 -82.81368107  | 0212 -65.86779380   |
| A144 124.20036081   | A96 121.49381947   | 05 -68.69749516   | 057 -68.55877292  | D109 -149.919710831 | D161 59.91037852   | 0213 115.583477     |
| A145 119.55862533   | A97 120.07486373   | 06 168.810612619  | 058 160.51251520  | D110 96.51674777    | D162 -28.25548998  | 0214 -65.25209758   |
| A146 115.48834341   | A98 121.91065504   | 07 54.13848651    | 059 9.53306479    | D111 -4.410708733   | D163 -97.471019470 | 0215 51.65663729    |
| A147 115.1796780    | A99 121.32697244   | 08 -158.08783762  | 060 42.53523440   | D112 -40.45844591   | D164 146.255891022 | 0216 -177.11263424  |
| A148 115.79318649   | A200 116.15614708  | 09 111.74450395   | 061 158.97342554  | D113 76.28940666    | D165 23.57412574   | 0217 158.34919734   |
| A149 117.056274408  | A100 119.51955948  | 10 -11.810272981  | 062 -50.7655392   | D114 -88.89431626   | D166 149.56306894  | 0218 110.97107743   |
| A150 1108.43197521  | A202 115.221601909 | 11 -174.748510166 | 063 -164.23564848 | D115 158.79299646   | D167 123.53802197  | 0219 -110.00774190  |
| A151 110.29442393   | A203 120.490981723 | 12 174.28642612   | 064 73.844408944  | D116 31.61857698    | D168 -19.63106649  | 0220 -56.11605186   |
| A152 120.13161486   | A204 116.81531159  | 13 -3.55467755    | 065 63.63877088   | D117 65.21004812    | D169 38.80754995   | 0221 111.8197992    |
| A153 131.33692596   | A205 117.963228103 | 14 4.33494916     | 066 -53.57780198  | D118 -53.28683203   | D170 -8.91394515   | 0222 -74.35286605   |
| A154 128.01892934   | A206 114.86359858  | 15 -119.74251893  | 067 -174.4696180  | D119 115.01553706   | D171 -52.86195031  | 0223 -168.84791010  |
| A155 1106.04616259  | A207 115.52934568  | 16 -116.15905554  | 068 -48.71022348  | D120 -18.90870559   | D172 -167.72972625 | 0224 -53.5728048    |

**2. Table S2.** Final Z matrix between AMINO ACID TYROSINE and PAMAM. With their absolute energies (Hartrees).

Electronic energy = -2402.193743 Hartrees.

|                          |                          |                              |
|--------------------------|--------------------------|------------------------------|
| H                        | H 45 B45 33 A44 27 D43 0 | H 86 B90 85 A89 82 D88 0     |
| C 1 B1                   | N 36 B46 24 A45 15 D44 0 | C 86 B91 85 A90 82 D89 0     |
| H 2 B2 1 A1              | H 47 B47 36 A46 24 D45 0 | C 92 B92 86 A91 85 D90 0     |
| C 2 B3 1 A2 3 D1 0       | C 41 B48 35 A47 21 D46 0 | H 92 B93 86 A92 85 D91 0     |
| H 4 B4 2 A3 1 D2 0       | H 49 B49 41 A48 35 D47 0 | H 92 B94 86 A93 85 D92 0     |
| H 4 B5 2 A4 1 D3 0       | H 49 B50 41 A49 35 D48 0 | C 93 B95 92 A94 86 D93 0     |
| N 4 B6 2 A5 1 D4 0       | C 49 B51 41 A50 35 D49 0 | C 93 B96 92 A95 86 D94 0     |
| N 2 B7 1 A6 4 D5 0       | H 52 B52 49 A51 41 D50 0 | C 93 B97 92 A96 86 D95 0     |
| C 8 B8 2 A7 1 D6 0       | H 52 B53 49 A52 41 D51 0 | C 98 B98 93 A97 92 D96 0     |
| H 9 B9 8 A8 2 D7 0       | N 52 B54 49 A53 41 D52 0 | C 97 B99 93 A98 92 D97 0     |
| H 9 B10 8 A9 2 D8 0      | H 55 B55 52 A54 49 D53 0 | H 97 B100 93 A99 92 D98 0    |
| C 8 B11 2 A10 1 D9 0     | H 55 B56 52 A55 49 D54 0 | H 98 B101 93 A100 92 D99 0   |
| H 12 B12 8 A11 2 D10 0   | C 43 B57 34 A56 30 D55 0 | H 99 B102 98 A101 93 D100 0  |
| H 12 B13 8 A12 2 D11 0   | H 58 B58 43 A57 34 D56 0 | H 100 B103 97 A102 93 D101 0 |
| C 7 B14 4 A13 2 D12 0    | H 58 B59 43 A58 34 D57 0 | O 96 B104 93 A103 92 D102 0  |
| H 15 B15 7 A14 4 D13 0   | C 58 B60 43 A59 34 D58 0 | H 105 B105 96 A104 93 D103 0 |
| H 15 B16 7 A15 4 D14 0   | H 61 B61 58 A60 43 D59 0 | O 87 B106 86 A105 85 D104 0  |
| C 7 B17 4 A16 2 D15 0    | H 61 B62 58 A61 43 D60 0 | H 107 B107 87 A106 86 D105 0 |
| H 18 B18 7 A17 4 D16 0   | N 61 B63 58 A62 43 D61 0 |                              |
| H 18 B19 7 A18 4 D17 0   | H 64 B64 61 A63 58 D62 0 |                              |
| C 18 B20 7 A19 4 D18 0   | H 64 B65 61 A64 58 D63 0 |                              |
| H 21 B21 18 A20 7 D19 0  | C 45 B66 33 A65 27 D64 0 |                              |
| H 21 B22 18 A21 7 D20 0  | H 67 B67 45 A66 33 D65 0 |                              |
| C 15 B23 7 A22 4 D21 0   | H 67 B68 45 A67 33 D66 0 |                              |
| H 24 B24 15 A23 7 D22 0  | C 67 B69 45 A68 33 D67 0 |                              |
| H 24 B25 15 A24 7 D23 0  | H 70 B70 67 A69 45 D68 0 |                              |
| C 9 B26 8 A25 2 D24 0    | H 70 B71 67 A70 45 D69 0 |                              |
| H 27 B27 9 A26 8 D25 0   | N 70 B72 67 A71 45 D70 0 |                              |
| H 27 B28 9 A27 8 D26 0   | H 73 B73 70 A72 67 D71 0 |                              |
| C 12 B29 8 A28 2 D27 0   | H 73 B74 70 A73 67 D72 0 |                              |
| H 30 B30 12 A29 8 D28 0  | C 47 B75 36 A74 24 D73 0 |                              |
| H 30 B31 12 A30 8 D29 0  | H 76 B76 47 A75 36 D74 0 |                              |
| C 27 B32 9 A31 8 D30 0   | H 76 B77 47 A76 36 D75 0 |                              |
| C 30 B33 12 A32 8 D31 0  | C 76 B78 47 A77 36 D76 0 |                              |
| C 21 B34 18 A33 7 D32 0  | H 79 B79 76 A78 47 D77 0 |                              |
| C 24 B35 15 A34 7 D33 0  | H 79 B80 76 A79 47 D78 0 |                              |
| O 36 B36 24 A35 15 D34 0 | N 79 B81 76 A80 47 D79 0 |                              |
| O 35 B37 21 A36 18 D35 0 | H 82 B82 79 A81 76 D80 0 |                              |
| O 34 B38 30 A37 12 D36 0 | H 82 B83 79 A82 76 D81 0 |                              |
| O 33 B39 27 A38 9 D37 0  | N 82 B84 79 A83 76 D82 0 |                              |
| N 35 B40 21 A39 18 D38 0 | C 85 B85 82 A84 79 D83 0 |                              |
| H 41 B41 35 A40 21 D39 0 | C 86 B86 85 A85 82 D84 0 |                              |
| N 34 B42 30 A41 12 D40 0 | O 87 B87 86 A86 85 D85 0 |                              |
| H 43 B43 34 A42 30 D41 0 | H 85 B88 82 A87 79 D86 0 |                              |
| N 33 B44 27 A43 9 D42 0  | H 85 B89 82 A88 79 D87 0 |                              |



Continuation

| 1              | 2              | 3                | 4                | 5                 | 6                 | 7                 | 8                 |
|----------------|----------------|------------------|------------------|-------------------|-------------------|-------------------|-------------------|
| B1 1.10737064  | B43 1.01670181 | B85 1.46444710   | A20 108.00467605 | A62 109.67684542  | A104 111.69969323 | D40 39.73505596   | D82 153.25897155  |
| B2 1.09252607  | B44 1.37587872 | B86 1.5244086    | A21 111.66989666 | A63 108.8812145   | A105 113.18646027 | D41 2.19240600    | D83 -33.7119440   |
| B3 1.53547475  | B45 1.00939883 | B87 1.21150990   | A22 112.82911635 | A64 109.31363031  | A106 105.84242291 | D42 -117.27127307 | D84 83.22815471   |
| B4 1.10181880  | B46 1.37048103 | B88 1.01638965   | A23 109.57089324 | A65 122.12247400  | D1 -116.04069517  | D43 -7.90198676   | D85 -167.71515154 |
| B5 1.09203422  | B47 1.00977219 | B89 1.01716471   | A24 110.64552952 | A66 109.53053012  | D2 -54.50757850   | D44 162.18205371  | D86 106.82460507  |
| B6 1.46200632  | B48 1.45651043 | B90 1.10639411   | A25 113.46026852 | A67 106.64400166  | D3 -170.91656381  | D45 -9.19679931   | D87 -146.38476332 |
| B7 1.47009909  | B49 1.09649715 | B91 1.54975966   | A26 108.72177893 | A68 113.03268618  | D4 69.97053437    | D46 175.14604999  | D88 -161.06976964 |
| B8 1.46523379  | B50 1.0916128  | B92 1.51431879   | A27 109.75969800 | A69 108.29682999  | D5 -126.66867698  | D47 154.51504210  | D89 -42.02233093  |
| B9 1.10551075  | B51 1.53478895 | B93 1.09768267   | A28 115.12885501 | A70 109.52076873  | D6 56.13125534    | D48 37.77688341   | D90 65.36294251   |
| B10 1.09274349 | B52 1.09436253 | B94 1.09354516   | A29 110.69077159 | A71 110.79676508  | D7 -88.38300629   | D49 -83.00570499  | D91 -58.07983080  |
| B11 1.47242172 | B53 1.10523655 | B95 2.83155323   | A30 108.73003031 | A72 110.37396816  | D8 28.22545135    | D50 63.84679156   | D92 -171.68255928 |
| B12 1.09537030 | B54 1.46434263 | B96 1.40511127   | A31 112.87153742 | A73 109.13672710  | D9 -69.87505454   | D51 -51.98004113  | D93 139.7227421   |
| B13 1.10736537 | B55 1.01768601 | B97 1.40077274   | A32 117.39487237 | A74 121.24902336  | D10 164.91766040  | D52 -178.18189741 | D94 -83.77417628  |
| B14 1.46803351 | B56 1.01610709 | B98 1.39567744   | A33 111.53511139 | A75 107.60247553  | D11 -49.57407710  | D53 75.71362579   | D95 97.03250193   |
| B15 1.10476473 | B57 1.45701050 | B99 1.39223590   | A34 112.18781462 | A76 108.81443186  | D12 166.67383146  | D54 -167.42676383 | D96 179.81766588  |
| B16 1.09204257 | B58 1.09347699 | B100 1.08662437  | A35 122.75079468 | A77 112.31860668  | D13 93.32556135   | D55 174.39226807  | D97 -179.41886441 |
| B17 1.46616247 | B59 1.09350295 | B101 1.08625978  | A36 122.39324983 | A78 107.74449265  | D14 -24.17688103  | D56 164.02928436  | D98 1.19607992    |
| B18 1.10425753 | B60 1.53494156 | B102 1.08717484  | A37 120.19366600 | A79 109.02076034  | D15 -62.95222381  | D57 46.52699068   | D99 -1.23850735   |
| B19 1.09342084 | B61 1.0181946  | B103 1.08548133  | A38 122.72751752 | A80 111.02150010  | D16 -25.67690899  | D58 -74.99391060  | D100 178.65813919 |
| B20 1.53767427 | B62 1.09392496 | B104 1.35569891  | A39 115.37797073 | A81 109.95130054  | D17 -142.31505942 | D59 -48.14820934  | D101 179.54090104 |
| B21 1.09715013 | B63 1.46942038 | B105 0.98872422  | A40 118.39234668 | A82 110.55209383  | D18 98.82506915   | D60 68.20607806   | D102 163.34498731 |
| B22 1.09455090 | B64 1.01897007 | B106 1.35380521  | A41 116.22023912 | A83 123.81812923  | D19 48.44230242   | D61 -173.33724246 | D103 169.56863746 |
| B23 1.53499689 | B65 1.01713530 | B107 0.97235621  | A42 119.55421139 | A84 148.16316332  | D20 -68.32488131  | D62 78.77922232   | D104 16.05226453  |
| B24 1.09827904 | B66 1.45934522 | A1 107.03867698  | A43 115.48532907 | A85 112.0182653   | D21 -144.35919415 | D63 -166.25640578 | D105 177.66266541 |
| B25 1.09713977 | B67 1.09650534 | A2 111.05565699  | A44 118.08973279 | A86 124.32892554  | D22 -158.46282747 | D64 -172.85742115 |                   |
| B26 1.54547343 | B68 1.09225062 | A3 109.89922211  | A45 114.99682245 | A87 94.44262880   | D23 -41.76164587  | D65 122.10976668  |                   |
| B27 1.09662232 | B69 1.53029027 | A4 107.63137190  | A46 117.69793799 | A88 81.44244992   | D24 149.22702656  | D66 4.91818872    |                   |
| B28 1.09484301 | B70 1.09571562 | A5 112.96557371  | A47 122.10330050 | A89 112.31338254  | D25 163.54520289  | D67 -115.94852692 |                   |
| B29 1.53492510 | B71 1.10285988 | A6 110.62195865  | A48 108.18751977 | A90 111.94639532  | D26 46.58672748   | D68 -177.50882588 |                   |
| B30 1.09691341 | B72 1.47007936 | A7 113.17658014  | A49 108.21028846 | A91 116.62166711  | D27 -74.29230767  | D69 -61.26122591  |                   |
| B31 1.09335813 | B73 1.01730769 | A8 111.24458581  | A50 113.20711324 | A92 106.65566196  | D28 53.59696883   | D70 63.74698974   |                   |
| B32 1.52370836 | B74 1.01867041 | A9 109.04256763  | A51 107.78673575 | A93 106.71939334  | D29 169.83424634  | D71 -177.39936823 |                   |
| B33 1.53423031 | B75 1.45972924 | A10 111.80715880 | A52 109.08475920 | A94 179.46739488  | D30 -72.75961667  | D72 -60.57286722  |                   |
| B34 1.52736302 | B76 1.09046907 | A11 107.83659250 | A53 109.68386046 | A95 121.67508267  | D31 -70.59661892  | D73 -168.89635701 |                   |
| B35 1.53130480 | B77 1.09669341 | A12 110.30536261 | A54 110.14707570 | A96 120.70819247  | D32 167.00160493  | D74 -34.00036729  |                   |
| B36 1.22656070 | B78 1.53669590 | A13 111.80410291 | A55 110.15213763 | A97 121.44011596  | D33 80.43327540   | D75 -150.86696173 |                   |
| B37 1.22784760 | B79 1.09311276 | A14 111.17574898 | A56 121.75373213 | A98 121.69846537  | D34 -17.79927760  | D76 85.88588627   |                   |
| B38 1.23082625 | B80 1.10642299 | A15 108.77940422 | A57 107.00476134 | A99 119.72093694  | D35 -34.11262874  | D77 -55.72862883  |                   |
| B39 1.22539415 | B81 1.46246899 | A16 115.22158047 | A58 109.49077648 | A100 119.22906240 | D36 -141.39253083 | D78 59.51865625   |                   |
| B40 1.36759792 | B82 1.02030353 | A17 111.29592434 | A59 112.75736633 | A101 120.03769313 | D37 61.48447613   | D79 -173.67792361 |                   |
| B41 1.00876047 | B83 1.01704609 | A18 109.65836953 | A60 108.68443905 | A102 121.27047229 | D38 146.33563720  | D80 158.39930155  |                   |
| B42 1.35602550 | B84 3.24659390 | A19 113.71034455 | A61 108.07643918 | A103 177.32618847 | D39 4.81117060    | D81 -83.11256747  |                   |

### 3. Table S3. Final Z matrix of PAMAM. With their absolute energies (Hartrees).

Electronic energy = -1715.758156 Hartrees.

|                          |                          |
|--------------------------|--------------------------|
| H                        |                          |
| C 1 B1                   | H 45 B45 33 A44 27 D43 0 |
| H 2 B2 1 A1              | N 36 B46 24 A45 15 D44 0 |
| C 2 B3 1 A2 3 D1 0       | H 47 B47 36 A46 24 D45 0 |
| H 4 B4 2 A3 1 D2 0       | C 41 B48 35 A47 21 D46 0 |
| H 4 B5 2 A4 1 D3 0       | H 49 B49 41 A48 35 D47 0 |
| N 4 B6 2 A5 1 D4 0       | H 49 B50 41 A49 35 D48 0 |
| N 2 B7 1 A6 4 D5 0       | C 49 B51 41 A50 35 D49 0 |
| C 8 B8 2 A7 1 D6 0       | H 52 B52 49 A51 41 D50 0 |
| H 9 B9 8 A8 2 D7 0       | H 52 B53 49 A52 41 D51 0 |
| H 9 B10 8 A9 2 D8 0      | N 52 B54 49 A53 41 D52 0 |
| C 8 B11 1 A10 1 D9 0     | H 55 B55 52 A54 49 D53 0 |
| H 12 B12 8 A11 2 D10 0   | H 55 B56 52 A55 49 D54 0 |
| H 12 B13 8 A12 2 D11 0   | C 43 B57 34 A56 30 D55 0 |
| C 7 B14 4 A13 2 D12 0    | H 58 B58 43 A57 34 D56 0 |
| H 15 B15 7 A14 4 D13 0   | H 58 B59 43 A58 34 D57 0 |
| H 15 B16 7 A15 4 D14 0   | C 58 B60 43 A59 34 D58 0 |
| C 7 B17 4 A16 2 D15 0    | H 61 B61 58 A60 43 D59 0 |
| H 18 B18 7 A17 4 D16 0   | H 61 B62 58 A61 43 D60 0 |
| H 18 B19 7 A18 4 D17 0   | N 61 B63 58 A62 43 D61 0 |
| C 18 B20 7 A19 4 D18 0   | H 64 B64 61 A63 58 D62 0 |
| H 21 B21 18 A20 7 D19 0  | H 64 B65 61 A64 58 D63 0 |
| H 21 B22 18 A21 7 D20 0  | C 45 B66 33 A65 27 D64 0 |
| C 15 B23 7 A22 4 D21 0   | H 67 B67 45 A66 33 D65 0 |
| H 24 B24 15 A23 7 D22 0  | H 67 B68 45 A67 33 D66 0 |
| H 24 B25 15 A24 7 D23 0  | C 67 B69 45 A68 33 D67 0 |
| C 9 B26 8 A25 2 D24 0    | H 70 B70 67 A69 45 D68 0 |
| H 27 B27 9 A26 8 D25 0   | H 70 B71 67 A70 45 D69 0 |
| H 27 B28 9 A27 8 D26 0   | N 70 B72 67 A71 45 D70 0 |
| C 12 B29 8 A28 2 D27 0   | H 73 B73 70 A72 67 D71 0 |
| H 30 B30 12 A29 8 D28 0  | H 73 B74 70 A73 67 D72 0 |
| H 30 B31 12 A30 8 D29 0  | C 47 B75 36 A74 24 D73 0 |
| C 27 B32 9 A31 8 D30 0   | H 76 B76 47 A75 36 D74 0 |
| C 30 B33 12 A32 8 D31 0  | H 76 B77 47 A76 36 D75 0 |
| C 21 B34 18 A33 7 D32 0  | C 76 B78 47 A77 36 D76 0 |
| C 24 B35 15 A34 7 D33 0  | H 79 B79 76 A78 47 D77 0 |
| O 36 B36 24 A35 15 D34 0 | H 79 B80 76 A79 47 D78 0 |
| O 35 B37 21 A36 18 D35 0 | N 79 B81 76 A80 47 D79 0 |
| O 34 B38 30 A37 12 D36 0 | H 82 B82 79 A81 76 D80 0 |
| O 33 B39 27 A38 9 D37 0  | H 82 B83 79 A82 76 D81 0 |
| N 35 B40 21 A39 18 D38 0 |                          |
| H 41 B41 35 A40 21 D39 0 |                          |
| N 34 B42 30 A41 12 D40 0 |                          |
| H 43 B43 34 A42 30 D41 0 |                          |
| N 33 B44 27 A43 9 D42 0  |                          |

## Continuation

| 1              | 2               | 3                | 4                 | 5                 | 6                 |
|----------------|-----------------|------------------|-------------------|-------------------|-------------------|
| B1 1.10522732  | B46 1.36762206  | A8 113.24258695  | A53 115.16468501  | D16 -52.84912860  | D61 -179.11919779 |
| B2 1.09575325  | B47 1.00871849  | A9 107.89885195  | A54 109.61292199  | D17 -169.85010147 | D62 172.06982574  |
| B3 1.55096965  | B48 1.45433018  | A10 113.50246033 | A55 110.05594928  | D18 71.78143519   | D63 -71.70917480  |
| B4 1.09577328  | B49 1.09739074  | A11 107.67651723 | A56 122.35094717  | D19 51.88534986   | D64 -167.39426499 |
| B5 1.09375303  | B50 1.09495936  | A12 109.59302276 | A57 109.40376693  | D20 -65.84490209  | D65 -41.72938461  |
| B6 1.46527024  | B51 1.54111043  | A13 113.55952177 | A58 106.83037578  | D21 -149.57350190 | D66 -158.51566931 |
| B7 1.46686960  | B52 1.09466002  | A14 112.73361753 | A59 113.15714519  | D22 -63.71990022  | D67 77.76698265   |
| B8 1.46376001  | B53 1.09733320  | A15 108.84236498 | A60 109.10239720  | D23 53.35080289   | D68 -46.26260459  |
| B9 1.10510442  | B54 1.46333068  | A16 114.79621632 | A61 108.33692040  | D24 156.35197674  | D69 69.79532475   |
| B10 1.09171161 | B55 1.01808224  | A17 112.73750023 | A62 109.34519308  | D25 -176.20509474 | D70 -167.25628523 |
| B11 1.45997670 | B56 1.01844313  | A18 108.88375041 | A63 110.02935806  | D26 65.81426218   | D71 -62.83151831  |
| B12 1.09692883 | B57 1.45594073  | A19 113.24126594 | A64 109.60541983  | D27 65.82842917   | D72 54.01804327   |
| B13 1.09284252 | B58 1.09399853  | A20 108.22785892 | A65 119.59920409  | D28 -67.15557241  | D73 -179.26661534 |
| B14 1.46377144 | B59 1.09357563  | A21 111.78456301 | A66 106.90584957  | D29 51.13475553   | D74 -32.27010251  |
| B15 1.10546634 | B60 1.53392570  | A22 112.37849909 | A67 109.10511745  | D30 -58.80883044  | D75 -148.72619937 |
| B16 1.09301301 | B61 1.09708561  | A23 111.46189454 | A68 111.91265523  | D31 168.47253858  | D76 88.49997026   |
| B17 1.46344524 | B62 1.10242841  | A24 108.27847381 | A69 107.58783991  | D32 170.03446808  | D77 -57.21016583  |
| B18 1.10665263 | B63 1.46487929  | A25 112.38119671 | A70 110.20264552  | D33 172.11344794  | D78 58.83843519   |
| B19 1.09179343 | B64 1.01656990  | A26 108.47291480 | A71 115.53060581  | D34 -35.74783980  | D79 -178.82363673 |
| B20 1.53423348 | B65 1.01805212  | A27 111.75613148 | A72 110.60658777  | D35 -44.70386617  | D80 -57.51530492  |
| B21 1.09663760 | B66 1.45611694  | A28 117.25554348 | A73 109.58147930  | D36 -45.52924601  | D81 59.35443732   |
| B22 1.09313190 | B67 1.09361513  | A29 111.15580630 | A74 121.97864758  | D37 -60.62286452  |                   |
| B23 1.53437600 | B68 1.09579013  | A30 109.67537426 | A75 107.09218678  | D38 135.34026214  |                   |
| B24 1.09553861 | B69 1.54125523  | A31 109.22971107 | A76 108.61666946  | D39 0.60892614    |                   |
| B25 1.09688059 | B70 1.09285058  | A32 110.12326336 | A77 113.44633926  | D40 133.83919866  |                   |
| B26 1.53923594 | B71 1.09605511  | A33 110.69734866 | A78 108.27047564  | D41 4.18413193    |                   |
| B27 1.09512669 | B72 1.46916335  | A34 111.24413916 | A79 109.47713663  | D42 118.73175472  |                   |
| B28 1.09489040 | B73 1.01814048  | A35 122.32212010 | A80 115.10227893  | D43 -10.19946187  |                   |
| B29 1.54840065 | B74 1.01875917  | A36 121.20106144 | A81 110.25973801  | D44 146.02797119  |                   |
| B30 1.09552436 | B75 1.45586184  | A37 121.54116548 | A82 109.87088369  | D45 -7.08322376   |                   |
| B31 1.09685245 | B76 1.09381297  | A38 121.62110976 | D1 -117.07520992  | D46 177.47990830  |                   |
| B32 1.52325168 | B77 1.09708622  | A39 115.92355711 | D2 -41.07865994   | D47 152.85390196  |                   |
| B33 1.52522155 | B78 1.54126996  | A40 120.86159235 | D3 -156.74330949  | D48 36.03887055   |                   |
| B34 1.52810504 | B79 1.09504784  | A41 115.92600128 | D4 80.78479149    | D49 -84.98717084  |                   |
| B35 1.52596529 | B80 1.09744081  | A42 118.63471375 | D5 -126.72246873  | D50 56.98837545   |                   |
| B36 1.22803378 | B81 1.46164722  | A43 116.35186880 | D6 58.03336843    | D51 -59.09120203  |                   |
| B37 1.23229461 | B82 1.01805548  | A44 118.00400310 | D7 -79.16231833   | D52 178.50855489  |                   |
| B38 1.22913287 | B83 1.01785690  | A45 115.42699933 | D8 38.89509387    | D53 -60.33188659  |                   |
| B39 1.22722524 | A1 106.28004599 | A46 118.66831927 | D9 -76.48089478   | D54 55.98657257   |                   |
| B40 1.36027927 | A2 109.62073260 | A47 120.75601107 | D10 -56.98011860  | D55 177.44398781  |                   |
| B41 1.02295958 | A3 110.17494413 | A48 108.23862507 | D11 -172.27745934 | D56 146.94861623  |                   |
| B42 1.36515662 | A4 108.01336281 | A49 108.04086577 | D12 -62.55279620  | D57 30.09910791   |                   |
| B43 1.00870859 | A5 115.86454485 | A50 113.44412893 | D13 86.47732949   | D58 -90.72114142  |                   |
| B44 1.37100287 | A6 112.61810401 | A51 108.24855884 | D14 -31.12422180  | D59 -61.10961758  |                   |
| B45 1.00953171 | A7 114.40528752 | A52 109.38117203 | D15 70.39944283   | D60 55.02776730   |                   |

#### 4. Table S4. Final Z matrix of YLAGKPQEH. With their absolute energies (Hartrees).

Electronic energy -3979.12754 Hartrees.

| N                        |                          |                                |                                |
|--------------------------|--------------------------|--------------------------------|--------------------------------|
| C 1 B1                   | H 42 B45 41 A44 24 D43 0 | H 83 B89 79 A88 60 D87 0       | C 133 B133 128 A132 127 D131 0 |
| C 2 B2 1 A1              | C 42 B46 41 A45 24 D44 0 | H 83 B90 79 A89 60 D88 0       | H 133 B134 128 A133 127 D132 0 |
| O 3 B3 2 A2 1 D1 0       | H 47 B47 42 A46 41 D45 0 | H 80 B91 79 A90 60 D89 0       | H 133 B135 128 A134 127 D133 0 |
| H 1 B4 2 A3 3 D2 0       | H 47 B48 42 A47 41 D46 0 | N 81 B92 80 A91 79 D90 0       | H 134 B136 133 A135 128 D134 0 |
| H 2 B5 1 A4 3 D3 0       | H 47 B49 42 A48 41 D47 0 | C 93 B93 81 A92 80 D91 0       | H 134 B137 133 A136 128 D135 0 |
| C 2 B6 1 A5 3 D4 0       | N 43 B50 42 A49 41 D48 0 | C 94 B94 93 A93 81 D92 0       | C 134 B138 133 A137 128 D136 0 |
| C 7 B7 2 A6 1 D5 0       | C 51 B51 43 A50 42 D49 0 | O 95 B95 94 A94 93 D93 0       | O 139 B139 134 A138 133 D137 0 |
| H 7 B8 2 A7 1 D6 0       | C 52 B52 51 A51 43 D50 0 | H 93 B96 81 A95 80 D94 0       | O 139 B140 134 A139 133 D138 0 |
| H 7 B9 2 A8 1 D7 0       | O 53 B53 52 A52 51 D51 0 | H 94 B97 93 A96 81 D95 0       | H 141 B141 139 A140 134 D139 0 |
| C 8 B10 7 A9 2 D8 0      | H 51 B54 43 A53 42 D52 0 | C 94 B98 93 A97 81 D96 0       | N 129 B142 128 A141 127 D140 0 |
| C 8 B11 7 A10 2 D9 0     | H 52 B55 51 A54 43 D53 0 | H 99 B99 94 A98 93 D97 0       | C 143 B143 129 A142 128 D141 0 |
| C 8 B12 7 A11 2 D10 0    | H 52 B56 51 A55 43 D54 0 | H 99 B100 94 A99 93 D98 0      | C 144 B144 143 A143 129 D142 0 |
| C 13 B13 8 A12 7 D11 0   | N 53 B57 52 A56 51 D55 0 | C 99 B101 94 A100 93 D99 0     | O 145 B145 144 A144 143 D143 0 |
| C 12 B14 8 A13 7 D12 0   | C 58 B58 53 A57 52 D56 0 | H 102 B102 99 A101 94 D100 0   | H 143 B146 129 A145 128 D144 0 |
| H 12 B15 8 A14 7 D13 0   | C 59 B59 58 A58 53 D57 0 | H 102 B103 99 A102 94 D101 0   | H 144 B147 143 A146 129 D145 0 |
| H 13 B16 8 A15 7 D14 0   | O 60 B60 59 A59 58 D58 0 | C 102 B104 99 A103 94 D102 0   | C 144 B148 143 A147 129 D146 0 |
| H 14 B17 13 A16 8 D15 0  | H 58 B61 53 A60 52 D59 0 | O 105 B105 102 A104 99 D103 0  | C 149 B149 144 A148 143 D147 0 |
| H 15 B18 12 A17 8 D16 0  | H 59 B62 58 A61 53 D60 0 | N 105 B106 102 A105 99 D104 0  | H 149 B150 144 A149 143 D148 0 |
| O 11 B19 8 A18 7 D17 0   | C 59 B63 58 A62 53 D61 0 | H 107 B107 105 A106 102 D105 0 | H 149 B151 144 A150 143 D149 0 |
| H 20 B20 11 A19 8 D18 0  | H 64 B64 59 A63 58 D62 0 | H 107 B108 105 A107 102 D106 0 | C 150 B152 149 A151 144 D150 0 |
| N 3 B21 2 A20 1 D19 0    | H 64 B65 59 A64 58 D63 0 | N 95 B109 94 A108 93 D107 0    | N 150 B153 149 A152 144 D151 0 |
| C 22 B22 3 A21 2 D20 0   | C 64 B66 59 A65 58 D64 0 | C 110 B110 95 A109 94 D108 0   | H 153 B154 150 A153 149 D152 0 |
| C 23 B23 22 A22 3 D21 0  | H 67 B67 64 A66 59 D65 0 | C 111 B111 110 A110 95 D109 0  | H 153 B155 150 A154 149 D153 0 |
| O 24 B24 23 A23 22 D22 0 | H 67 B68 64 A67 59 D66 0 | O 112 B112 111 A111 110 D110 0 | C 154 B156 150 A155 149 D154 0 |
| H 22 B25 3 A24 2 D23 0   | C 67 B69 64 A68 59 D67 0 | H 110 B113 95 A112 94 D111 0   | N 157 B157 154 A156 150 D155 0 |
| H 23 B26 22 A25 3 D24 0  | H 70 B70 67 A69 64 D68 0 | H 111 B114 110 A113 95 D112 0  | H 157 B158 154 A157 150 D156 0 |
| C 23 B27 22 A26 3 D25 0  | C 70 B71 67 A70 64 D69 0 | C 111 B115 110 A114 95 D113 0  | H 145 B159 144 A158 143 D157 0 |
| C 28 B28 23 A27 22 D26 0 | H 70 B72 67 A71 64 D70 0 | H 116 B116 111 A115 110 D114 0 | H 1 B160 2 A159 3 D158 0       |
| H 28 B29 23 A28 22 D27 0 | H 72 B73 70 A72 67 D71 0 | H 116 B117 111 A116 110 D115 0 |                                |
| C 29 B30 28 A29 23 D28 0 | H 72 B74 70 A73 67 D72 0 | C 116 B118 111 A117 110 D116 0 |                                |
| H 31 B31 29 A30 28 D29 0 | N 72 B75 70 A74 67 D73 0 | H 119 B119 116 A118 111 D117 0 |                                |
| H 28 B32 23 A31 22 D30 0 | H 76 B76 72 A75 70 D74 0 | H 119 B120 116 A119 111 D118 0 |                                |
| C 31 B33 29 A32 28 D31 0 | H 76 B77 72 A76 70 D75 0 | C 119 B121 116 A120 111 D119 0 |                                |
| H 34 B34 31 A33 29 D32 0 | N 60 B78 59 A77 58 D76 0 | O 122 B122 119 A121 116 D120 0 |                                |
| H 34 B35 31 A34 29 D33 0 | C 79 B79 60 A78 59 D77 0 | N 122 B123 119 A122 116 D121 0 |                                |
| H 34 B36 31 A35 29 D34 0 | C 80 B80 79 A79 60 D78 0 | H 124 B124 122 A123 119 D122 0 |                                |
| H 29 B37 28 A36 23 D35 0 | O 81 B81 80 A80 79 D79 0 | H 124 B125 122 A124 119 D123 0 |                                |
| H 29 B38 28 A37 23 D36 0 | C 79 B82 60 A81 59 D80 0 | N 112 B126 111 A125 110 D124 0 |                                |
| H 29 B39 28 A38 23 D37 0 | C 80 B83 79 A82 60 D81 0 | C 127 B127 112 A126 111 D125 0 |                                |
| N 24 B40 23 A39 22 D38 0 | H 84 B84 80 A83 79 D82 0 | C 128 B128 127 A127 112 D126 0 |                                |
| C 41 B41 24 A40 23 D39 0 | C 83 B85 79 A84 60 D83 0 | O 129 B129 128 A128 127 D127 0 |                                |
| C 42 B42 41 A41 24 D40 0 | H 84 B86 80 A85 79 D84 0 | H 127 B130 112 A129 111 D128 0 |                                |
| O 43 B43 42 A42 41 D41 0 | H 86 B87 83 A86 79 D85 0 | H 128 B131 127 A130 112 D129 0 |                                |
| H 41 B44 24 A43 23 D42 0 | H 86 B88 83 A87 79 D86 0 | C 128 B132 127 A131 112 D130 0 |                                |



## Continuation

| 1              | 2              | 3               | 4                | 5                | 6                 | 7                 | 8                   |
|----------------|----------------|-----------------|------------------|------------------|-------------------|-------------------|---------------------|
| B1 1.46634367  | B46 1.53102789 | B91 1.09188505  | B136 1.09901251  | A21 121.19422194 | A66 109.47629015  | A111 118.75501499 | A156 111.57958535   |
| B2 1.53401885  | B47 1.09352655 | B92 1.35540970  | B137 1.09247014  | A22 113.61066485 | A67 110.92120563  | A112 118.88065880 | A157 121.6.01005305 |
| B3 1.23505219  | B48 1.09107924 | B93 1.45826240  | B138 1.50957412  | A23 119.77818840 | A68 111.56966502  | A113 105.17915536 | A158 113.99592630   |
| B4 1.01754515  | B49 1.09589292 | B94 1.54436299  | B139 1.21724703  | A24 113.85148731 | A69 109.85436121  | A114 112.86000841 | A159 110.75313356   |
| B5 1.09952258  | B50 1.34976323 | B95 1.22510952  | B140 1.35209841  | A25 107.98639187 | A70 112.89660530  | A115 107.29897680 | D1 168.77093189     |
| B6 1.55239576  | B51 1.44947204 | B96 1.00981763  | B141 0.97239912  | A26 112.93540844 | A71 109.50232285  | A116 108.57379376 | D2 155.112.76659    |
| B7 1.51272622  | B52 1.53463981 | B97 1.09423940  | B142 1.35930349  | A27 102.33525030 | A72 109.09106366  | A117 114.48963380 | D3 119.21733873     |
| B8 1.09396996  | B53 1.23373080 | B98 1.53855364  | B143 1.45641046  | A28 105.40039927 | A73 108.99526394  | A118 109.93689911 | D4 -119.79815832    |
| B9 1.09645573  | B54 1.01855550 | B99 1.09698438  | B144 1.52846853  | A29 33.06296493  | A74 110.84333178  | A119 110.87934941 | D5 -63.72916962     |
| B10 2.82029598 | B55 1.09235445 | B100 1.09182950 | B145 1.20992114  | A30 107.97512035 | A75 109.56472726  | A120 110.91640117 | D6 173.72593990     |
| B11 1.40512841 | B56 1.09358403 | B101 1.54185516 | B146 1.01509346  | A31 107.93593238 | A76 110.08847532  | A121 122.34073250 | D7 58.32950114      |
| B12 1.39968360 | B57 1.35625143 | B102 1.09424131 | B147 1.09972781  | A32 110.18530969 | A77 122.95157031  | A122 114.84121848 | D8 -6.64914381      |
| B13 1.39646332 | B58 1.46353256 | B103 1.09517649 | B148 1.53592445  | A33 111.47788367 | A78 117.70780266  | A123 121.88252230 | D9 -75.35341332     |
| B14 1.38894541 | B59 1.54425892 | B104 1.52639470 | B149 1.50174643  | A34 110.96663566 | A79 114.10745180  | A124 116.66168898 | D10 103.85829839    |
| B15 1.08736579 | B60 1.24402520 | B105 1.22289568 | B150 1.09619460  | A35 111.02709575 | A80 121.01470186  | A125 118.83685567 | D11 -179.00854619   |
| B16 1.08745090 | B61 1.01449090 | B106 1.37040666 | B151 1.09376492  | A36 95.63428002  | A81 129.70254341  | A126 119.01683882 | D12 179.02966010    |
| B17 1.08769116 | B62 1.09078085 | B107 1.01406231 | B152 1.37684633  | A37 91.55350946  | A82 104.30623164  | A127 114.59103825 | D13 -1.66606648     |
| B18 1.08473507 | B63 1.54600739 | B108 1.01009347 | B153 1.38712937  | A38 143.48001677 | A83 110.34365642  | A128 119.00067200 | D14 2.05530061      |
| B19 1.36315129 | B64 1.09747838 | B109 1.36250925 | B154 1.07943977  | A39 117.62457894 | A84 102.76175080  | A129 119.29520641 | D15 -179.53955566   |
| B20 0.96637428 | B65 1.09525727 | B110 1.45649847 | B155 2.13735171  | A40 121.85971633 | A85 110.55018445  | A130 104.69909143 | D16 119.45088195    |
| B21 1.35925258 | B66 1.53525991 | B111 1.54036503 | B156 1.31758662  | A41 113.67469943 | A86 110.09509089  | A131 113.88394093 | D17 -69.98558834    |
| B22 1.46198672 | B67 1.09831957 | B112 1.22567387 | B157 1.36214122  | A42 118.63506432 | A87 112.16189064  | A132 113.43671358 | D18 -177.71392042   |
| B23 1.53538011 | B68 1.09706803 | B113 1.01190094 | B158 1.08139278  | A43 117.93386526 | A88 109.87529155  | A133 107.45007010 | D19 -12.40977624    |
| B24 1.23302196 | B69 1.53530692 | B114 1.09282596 | B159 1.11221094  | A44 108.07597323 | A89 111.91562841  | A134 107.84257845 | D20 -162.83430616   |
| B25 1.01753758 | B70 1.09544190 | B115 1.54419832 | B160 1.01672817  | A45 110.65307890 | A90 108.85919130  | A135 109.33232259 | D21 -67.77983028    |
| B26 1.09675890 | B71 1.52950641 | B116 1.09591872 | B161 1.01662607  | A46 110.72013097 | A91 116.02869486  | A136 112.07977061 | D22 158.34722141    |
| B27 1.54432407 | B72 1.01040286 | B117 1.09264028 | A2 121.22224148  | A47 109.19509582 | A92 122.81550292  | A137 115.72571760 | D23 -5.05786148     |
| B28 2.58460413 | B73 1.09866320 | B118 1.53565757 | A3 109.49244381  | A48 111.16747841 | A93 114.54926730  | A138 125.01588377 | D24 45.85215675     |
| B29 1.09482108 | B74 1.10714318 | B119 1.09665026 | A4 113.43691188  | A49 117.79275905 | A94 118.62899614  | A139 113.45953115 | D25 164.44522417    |
| B30 1.53703005 | B75 1.46665049 | B120 1.09324947 | A5 110.67729373  | A50 120.66267861 | A95 118.04359768  | A140 106.03359931 | D26 42.92702492     |
| B31 1.09886454 | B76 1.01825058 | B121 1.52713177 | A6 113.13501391  | A51 116.04512596 | A96 107.49585673  | A141 118.15255620 | D27 -165.22433538   |
| B32 1.09876569 | B77 1.01749815 | B122 1.22462462 | A7 107.19561750  | A52 118.15647369 | A97 110.44915038  | A142 121.40944561 | D28 124.53302173    |
| B33 1.53706147 | B78 1.35537340 | B123 1.36595710 | A8 108.22439805  | A53 121.23827908 | A98 107.84484456  | A143 109.72182399 | D29 -119.79421867   |
| B34 1.09475253 | B79 1.48374388 | B124 1.01282796 | A9 179.12419502  | A54 110.90791122 | A99 107.96584738  | A144 124.27537707 | D30 -51.96387714    |
| B35 1.09442686 | B80 1.52934197 | B125 1.00923885 | A10 120.82869841 | A55 108.20897802 | A100 114.85052356 | A145 120.67153967 | D31 123.04503904    |
| B36 1.09668841 | B81 1.23186654 | B126 1.37460337 | A11 121.35637181 | A56 118.65714401 | A101 109.59439715 | A146 104.99172064 | D32 176.79566631    |
| B37 1.09375567 | B82 1.48060165 | B127 1.45802813 | A12 121.40889440 | A57 119.35473959 | A102 112.57502381 | A147 114.60259717 | D33 56.56840638     |
| B38 1.09739014 | B83 1.54499894 | B128 1.53695106 | A13 121.51127631 | A58 115.32294286 | A103 110.15482578 | A148 115.09493819 | D34 -63.01748487    |
| B39 1.09464150 | B84 1.09578997 | B129 1.23371062 | A14 119.51113431 | A59 117.02503929 | A104 122.03106686 | A149 107.15451552 | D35 0.95153682      |
| B40 1.35468088 | B85 1.53201127 | B130 1.01346802 | A15 119.60823333 | A60 119.84545012 | A105 115.49010820 | A150 108.32281363 | D36 -107.23597149   |
| B41 1.45797031 | B86 1.09034296 | B131 1.09526158 | A16 120.05758416 | A61 104.96296297 | A106 123.00459724 | A151 129.81058852 | D37 130.38112514    |
| B42 1.54281204 | B87 1.09486501 | B132 1.54401200 | A17 121.35598731 | A62 114.31701211 | A107 115.67690370 | A152 120.34709948 | D38 -21.33256928    |
| B43 1.23546951 | B88 1.09338099 | B133 1.53417655 | A18 177.06544969 | A63 106.71961044 | A108 117.09401482 | A153 131.74179336 | D39 174.09401249    |
| B44 1.01015205 | B89 1.09622482 | B134 1.09445030 | A19 109.51602099 | A64 106.53744391 | A109 121.27406915 | A154 127.91482860 | D40 -64.28852974    |
| B45 1.09413664 | B90 1.08653221 | B135 1.09126140 | A20 115.41881968 | A65 118.51189558 | A110 114.95851533 | A155 105.73186214 | D41 166.03878750    |

| 9                 | 10                 | 11                 |
|-------------------|--------------------|--------------------|
| D42 3.39709132    | D87 94.25256647    | D132 -56.13914843  |
| D43 51.09019053   | D88 -25.94577630   | D133 -171.94822974 |
| D44 170.85298449  | D89 53.30791323    | D134 63.06326173   |
| D45 -60.81471749  | D90 -30.32353922   | D135 -54.90315372  |
| D46 179.44360842  | D91 -177.84542589  | D136 -177.15938230 |
| D47 60.21431261   | D92 -72.45579539   | D137 151.35640578  |
| D48 -13.74346365  | D93 168.36184792   | D138 -30.49911685  |
| D49 175.71725913  | D94 4.64780101     | D139 -179.19837727 |
| D50 -73.57593935  | D95 42.29467542    | D140 8.98638208    |
| D51 163.82610487  | D96 160.41993205   | D141 176.68085243  |
| D52 -1.40605751   | D97 -60.63350669   | D142 -119.37801413 |
| D53 47.69193180   | D98 -176.30648769  | D143 -153.24444587 |
| D54 165.72345305  | D99 62.18936361    | D144 -5.12144145   |
| D55 -18.10821535  | D100 69.11486318   | D145 -6.53439307   |
| D56 -173.97790486 | D101 -49.40539148  | D146 114.40295602  |
| D57 -86.22100888  | D102 -172.81634353 | D147 -65.86385740  |
| D58 140.24972382  | D103 -66.34416065  | D148 171.18867255  |
| D59 2.72050555    | D104 113.32014782  | D149 57.14224237   |
| D60 24.95434371   | D105 -13.75565956  | D150 -20.62404981  |
| D61 140.85437415  | D106 -171.74622053 | D151 162.10371283  |
| D62 -51.20235072  | D107 -11.59337558  | D152 5.48096412    |
| D63 -164.19760292 | D108 176.13774780  | D153 -177.69091812 |
| D64 73.23444353   | D109 -117.29228643 | D154 177.46996343  |
| D65 52.87571696   | D110 162.83942898  | D155 0.18756771    |
| D66 -64.92342136  | D111 -3.35028833   | D156 -179.39226328 |
| D67 172.55334443  | D112 -3.14081661   | D157 28.16626719   |
| D68 -58.37098719  | D113 113.73623252  | D158 -87.89010300  |
| D69 179.63131360  | D114 -63.04457303  |                    |
| D70 57.87099608   | D115 -178.82181255 |                    |
| D71 54.66207899   | D116 58.65727148   |                    |
| D72 -60.67653857  | D117 64.03722825   |                    |
| D73 172.95038352  | D118 -54.68263081  |                    |
| D74 61.00699550   | D119 -177.55782858 |                    |
| D75 177.23383001  | D120 -56.03853413  |                    |
| D76 -39.76171286  | D121 124.63091769  |                    |
| D77 -172.72775942 | D122 -10.96721647  |                    |
| D78 -65.39219189  | D123 -173.96813447 |                    |
| D79 152.28686254  | D124 -16.73923972  |                    |
| D80 -5.84358454   | D125 -176.38312266 |                    |
| D81 171.46940729  | D126 -137.73621329 |                    |
| D82 94.25022989   | D127 -172.41784394 |                    |
| D83 -147.06017578 | D128 -15.23952063  |                    |
| D84 -144.94794972 | D129 -22.58019149  |                    |
| D85 81.98608224   | D130 93.33916285   |                    |
| D86 -157.37067871 | D131 66.34762538   |                    |

## 5. Table S5. Final Z matriz AMINO ACID TYROSINE. With their absolute energies (Hartrees).

Electronic energy = -686.38578225 Hartrees.

| N                        | 1                | 2                 |
|--------------------------|------------------|-------------------|
| C 1 B1                   | B1 1.45919932    | A17 130.62621889  |
| C 2 B2 1 A1              | B2 1.53215016    | A18 121.29482725  |
| O 3 B3 2 A2 1 D1 O       | B3 1.21221889    | A19 117.54892749  |
| H 1 B4 2 A3 3 D2 O       | B4 1.01802645    | A20 119.41301167  |
| H 1 B5 2 A4 3 D3 O       | B5 1.01942244    | A21 119.21686895  |
| H 2 B6 1 A5 3 D4 O       | B6 1.09640625    | A22 120.56951030  |
| C 2 B7 1 A6 3 D5 O       | B7 1.54732325    | A23 119.65774456  |
| C 8 B8 2 A7 1 D6 O       | B8 1.50453946    | A24 112.38407872  |
| H 8 B9 2 A8 1 D7 O       | B9 1.09442720    | A25 106.38197603  |
| H 8 B10 2 A9 1 D8 O      | B10 1.10091633   | D1 -11.79674963   |
| C 9 B11 8 A10 2 D9 O     | B11 1.37389360   | D2 -60.27459097   |
| C 9 B12 8 A11 2 D10 O    | B12 1.44416188   | D3 53.27506892    |
| H 12 B13 9 A12 8 D11 O   | B13 1.07903911   | D4 118.30232193   |
| N 12 B14 9 A13 8 D12 O   | B14 1.38305324   | D5 -123.29024936  |
| C 15 B15 12 A14 9 D13 O  | B15 1.37866446   | D6 -66.98668930   |
| H 15 B16 12 A15 9 D14 O  | B16 1.00635634   | D7 171.41423213   |
| C 13 B17 9 A16 8 D15 O   | B17 1.40586504   | D8 57.38004934    |
| C 16 B18 15 A17 12 D16 O | B18 1.39858182   | D9 38.31840257    |
| H 19 B19 16 A18 15 D17 O | B19 1.08653750   | D10 -142.59422170 |
| C 19 B20 16 A19 15 D18 O | B20 1.39004819   | D11 -0.77363027   |
| H 21 B21 19 A20 16 D19 O | B21 1.08600320   | D12 179.47119966  |
| C 18 B22 13 A21 9 D20 O  | B22 1.38914561   | D13 -0.14851595   |
| H 18 B23 13 A22 9 D21 O  | B23 1.08665536   | D14 179.20406290  |
| H 23 B24 18 A23 13 D22 O | B24 1.08605905   | D15 0.63329189    |
| O 3 B25 2 A24 1 D23 O    | B25 1.35440064   | D16 179.86468892  |
| H 26 B26 3 A25 2 D24 O   | B26 0.97248676   | D17 0.10292729    |
|                          | A1 112.09271595  | D18 -179.95684809 |
|                          | A2 124.99311942  | D19 -179.94551825 |
|                          | A3 109.18153268  | D20 179.68520880  |
|                          | A4 108.26130259  | D21 -0.41628406   |
|                          | A5 108.64717565  | D22 -179.98342989 |
|                          | A6 111.25995093  | D23 168.51990233  |
|                          | A7 114.81999299  | D24 178.96622506  |
|                          | A8 107.94132153  |                   |
|                          | A9 107.81936109  |                   |
|                          | A10 128.32489620 |                   |
|                          | A11 125.27477706 |                   |
|                          | A12 128.49172984 |                   |
|                          | A13 109.82358005 |                   |
|                          | A14 109.49190745 |                   |
|                          | A15 125.02669930 |                   |
|                          | A16 134.08025258 |                   |
